# Supplementary material for: Metallic Octahedral CoSe2 Threaded by N‐Doped Carbon Nanotubes: A Flexible Framework for High‐Performance Potassium‐Ion Batteries
Source: PubMed Central journal article supplement (PMC6193164; doi:10.1002/advs.201800782), 2018-08-07
Supplement: ADVS-5-1800782-s001.pdf [file ADVS-5-1800782-s001.pdf]

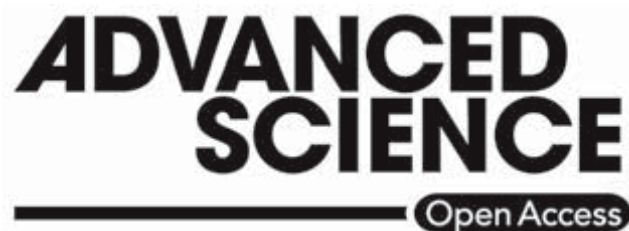

## Supporting Information

for *Adv. Sci.*, DOI: 10.1002/advs.201800782

**Metallic Octahedral CoSe<sub>2</sub> Threaded by N-Doped Carbon Nanotubes: A Flexible Framework for High-Performance Potassium-Ion Batteries**

*Qiyao Yu, Bo Jiang, Jun Hu, Cheng-Yen Lao, Yunzhi Gao,\* Peihao Li, Zhiwei Liu, Guoquan Suo,\* Donglin He, Wei (Alex) Wang,\* and Geping Yin*

## Supporting Information

**Metallic Octahedral CoSe<sub>2</sub> Threaded by N-doped Carbon Nanotubes: A Flexible Framework for High-Performance Potassium-Ion Batteries**

Qiyao Yu, Bo Jiang, Jun Hu, Chengyen Lao, Yunzhi Gao,\* Peihao Li, Zhiwei Liu, Guoquan Suo,\*  
Donglin He, Wei Wang,\* Geping Yin

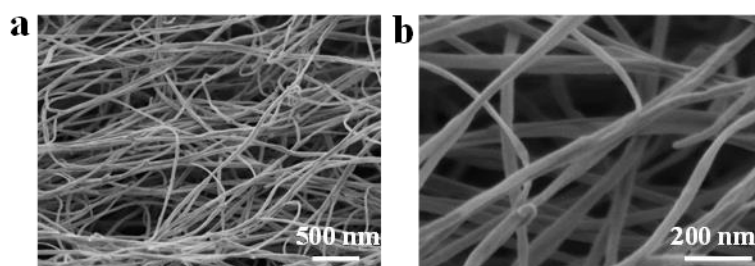

**Figure S1.** SEM images of NCNF.

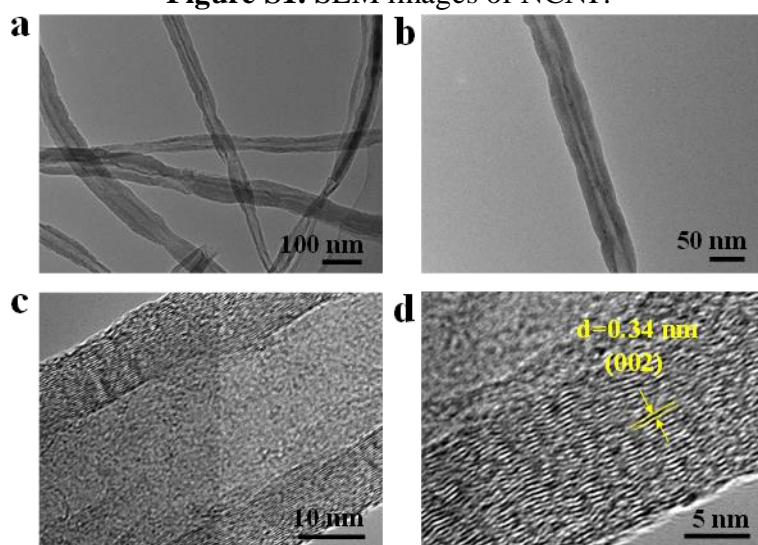

**Figure S2.** (a,b) TEM and (c,d) HRTEM images of NCNF.

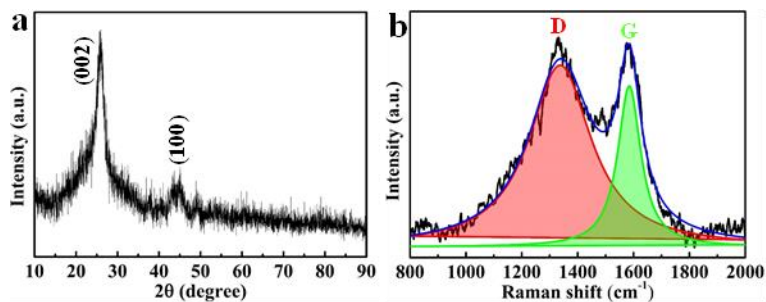

**Figure S3.** (a) XRD pattern and (b) Raman spectrum of the NCNF.

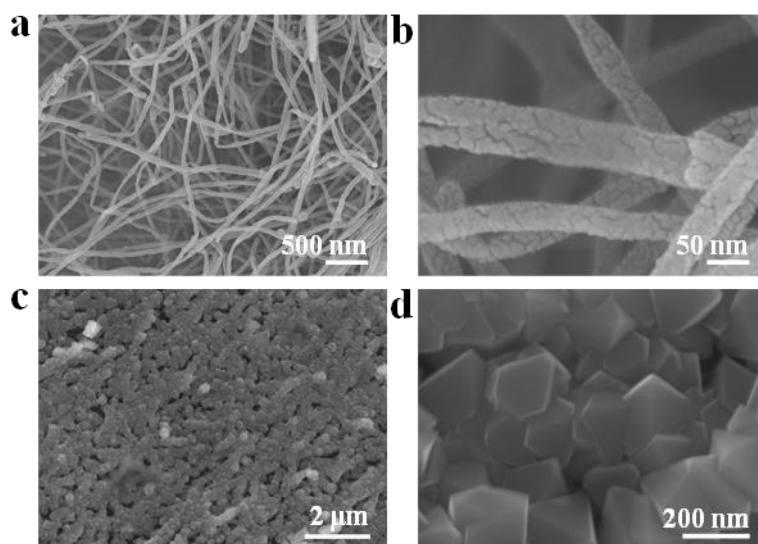

**Figure S4.** SEM images of (a,b) NCNF@CS-3h and (c,d) NCNF@CS-12h.

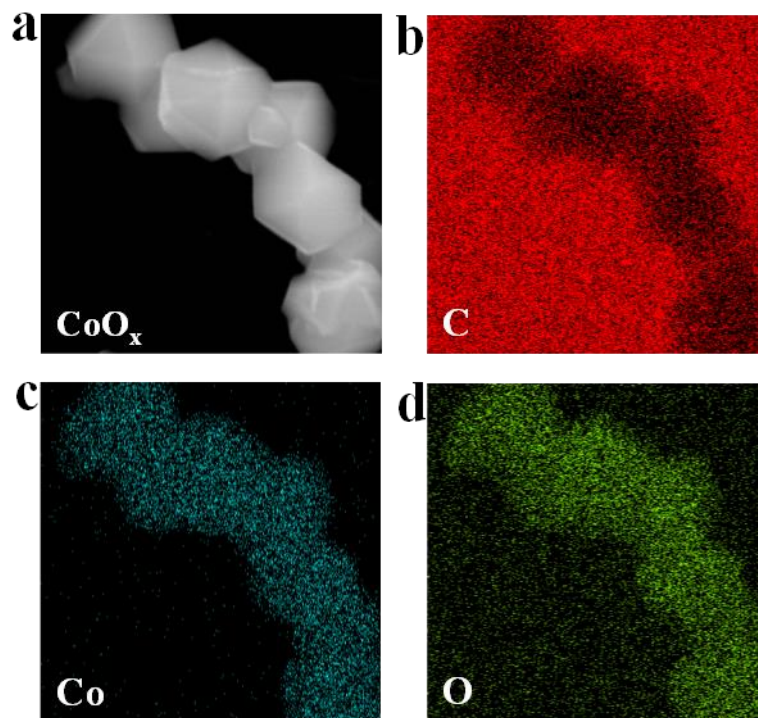

**Figure S5.** (a) HAADF-STEM image and EDS mappings of (b) C, (c) Co and (d) O of NCNF@CoO<sub>x</sub>-6h.

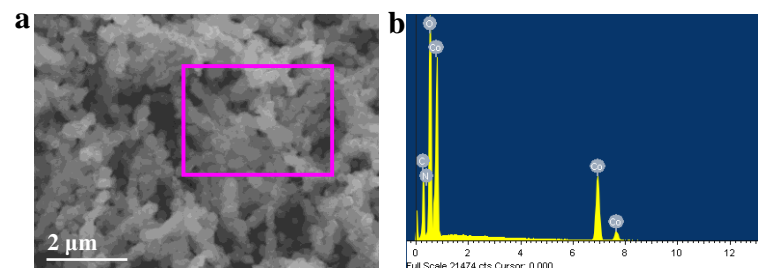

**Figure S6.** (a) SEM image and EDS spectra of NCNF@CoO<sub>x</sub>-6h.

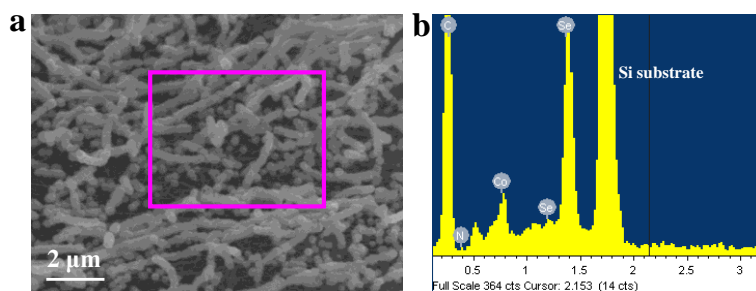

**Figure S7.** (a) SEM image and EDS spectra of NCNF@CS-6h.

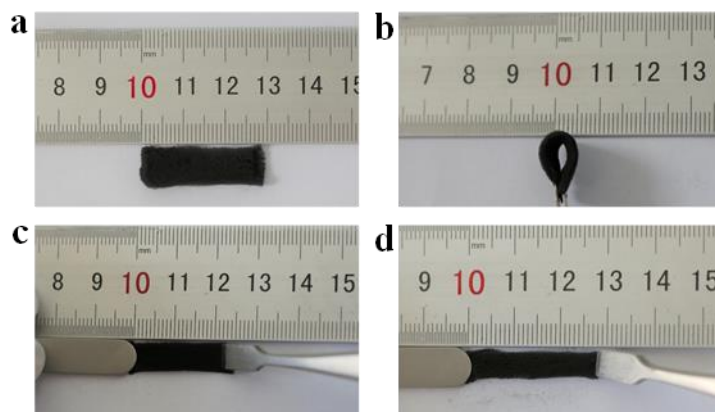

**Figure S8.** The (a and b) flexible and (c and d) tensile testing of NCNF@CS-6h.

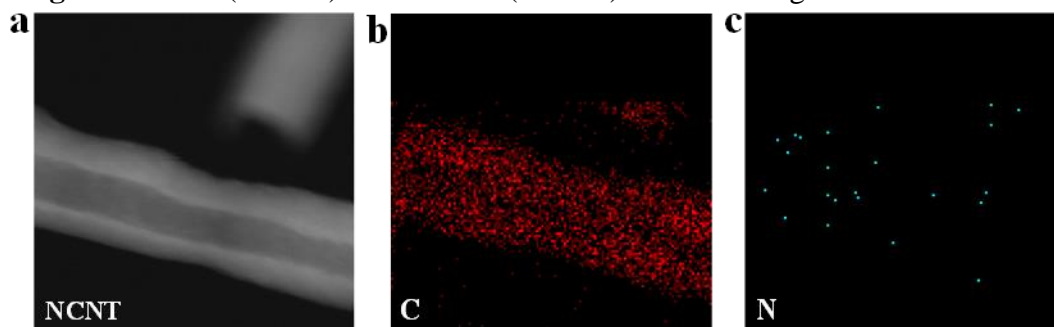

**Figure S9.** (a) HAADF-STEM image and EDS mappings of (b) C, and (c) N in NCNF.

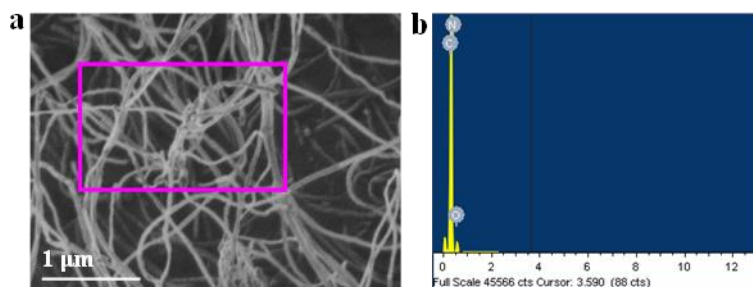

**Figure S10.** (a) SEM image and EDS spectra of NCNF.

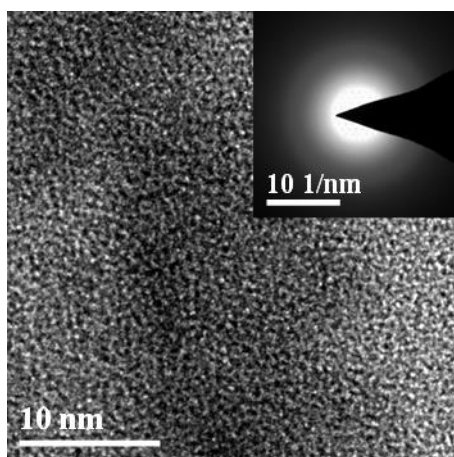

**Figure S11.** HRTEM image and the corresponding SAED pattern (inset) of CoO<sub>x</sub> in NCNF@CoO<sub>x</sub>-6h.

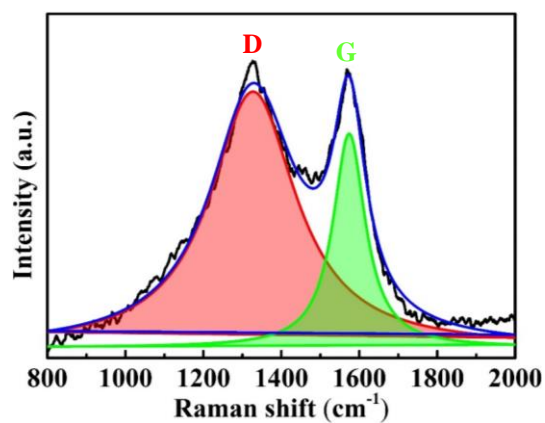

**Figure S12.** Raman spectrum of NCNF@CS-6h.

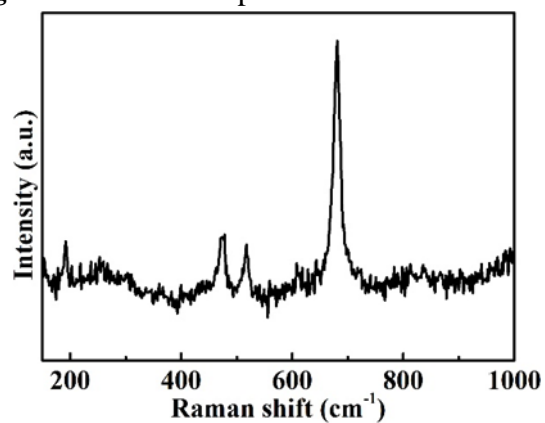

**Figure S13.** Raman spectra of cobalt selenide.

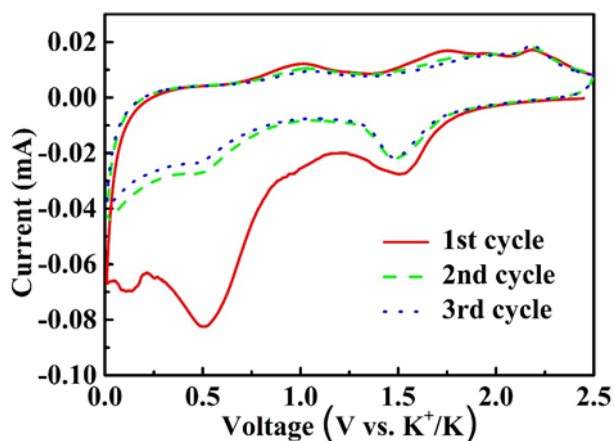

**Figure S14.** CV curves of NCNF@CS-6h for the initial 3 cycles at a sweep rate of  $0.1 \text{ mV s}^{-1}$ .

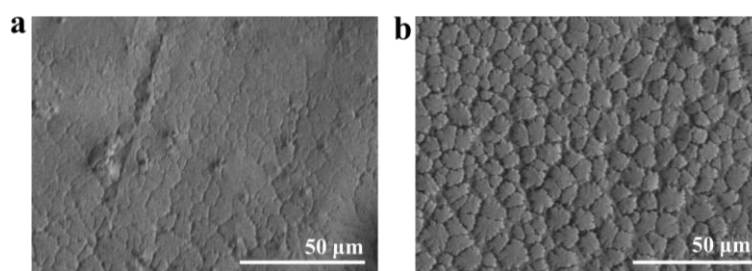

**Figure S15.** The SEM images of K metal surface after (a) 3 cycles and (b) 100 cycles.

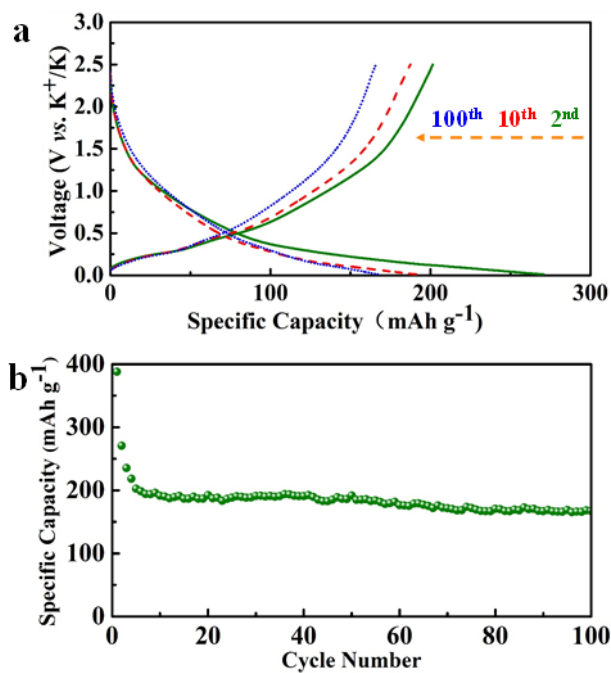

**Figure S16.** (a) The 2nd, 10th and 100th charge/discharge profiles of NCNF. (b) Cycling stability of NCNF at  $0.2 \text{ A g}^{-1}$  for KIBs.

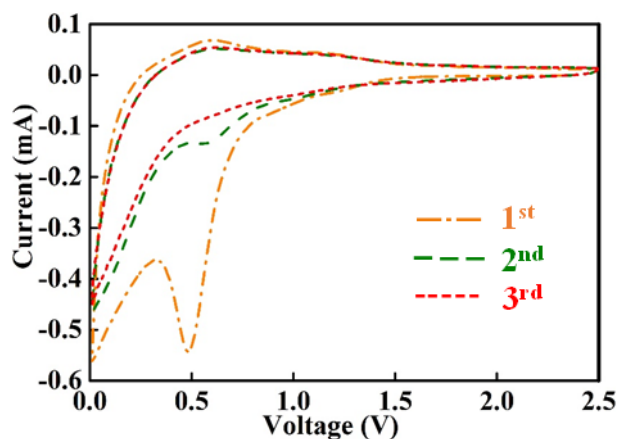

**Figure S17.** CV curves of NCNF for the initial 3 cycles at a sweep rate of  $0.1 \text{ mV s}^{-1}$ .

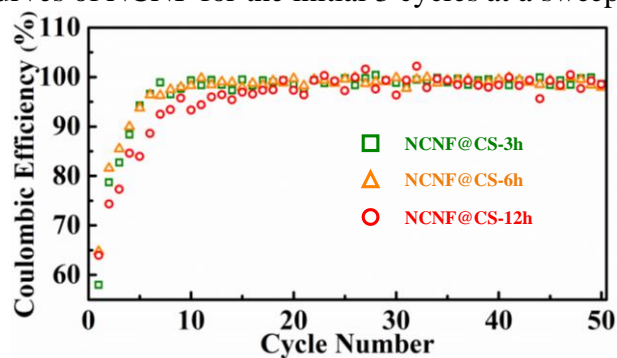

**Figure S18.** The corresponding Coulombic efficiencies of the as-prepared three samples.

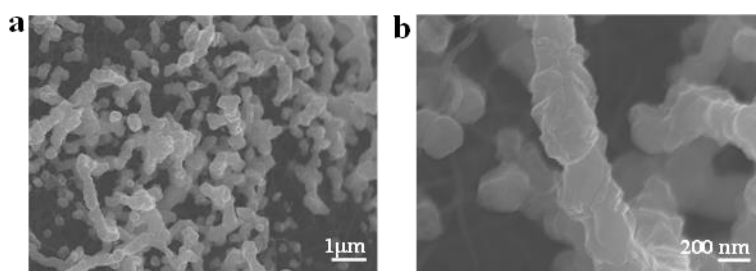

**Figure S19.** SEM images of NCNF@CS-6h after 600 cycles.

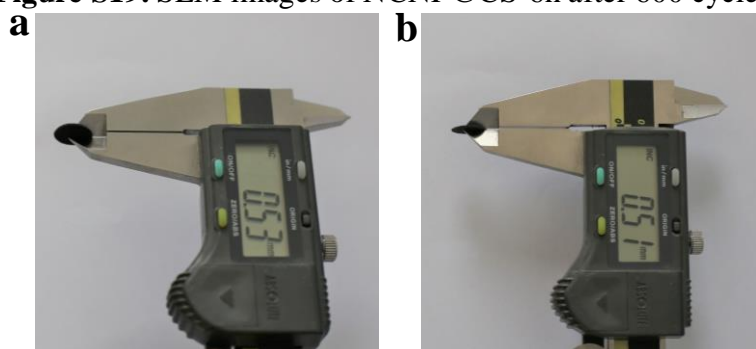

**Figure S20.** Optical photographs of the NCNF@CS-6h electrode: (a) original and (b) after 200 cycles.

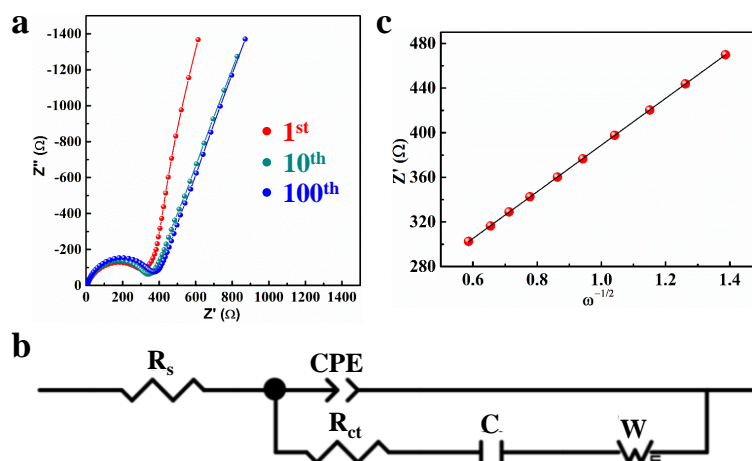

**Figure S21.** (a) nyquist plots, (b) the linear fits of the  $Z'$  vs.  $\omega^{-1/2}$  in the low-frequency region and (c) the corresponding equivalent circuit of the coin cell.

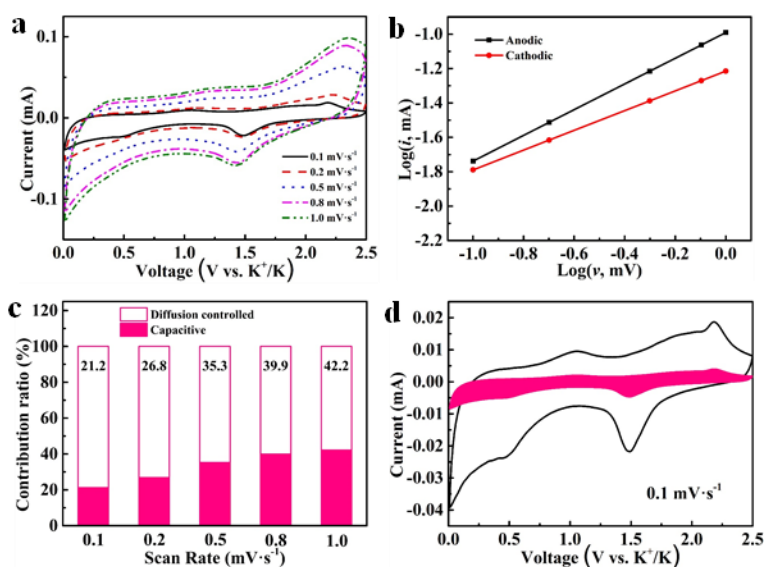

**Figure S22.** (a) CV profiles at different scan rates and (b) the plots of  $\log(i)$  vs.  $\log(v)$  (peak current:  $i$ , scan rate:  $v$ ) of NCNF@CS-6h. (c) The percentages of pseudocapacitive contributions at different scan rates. (d) The red region shows the CV profile with the pseudocapacitive contribution at scan rate of  $0.1 \text{ mV}\cdot\text{s}^{-1}$ .

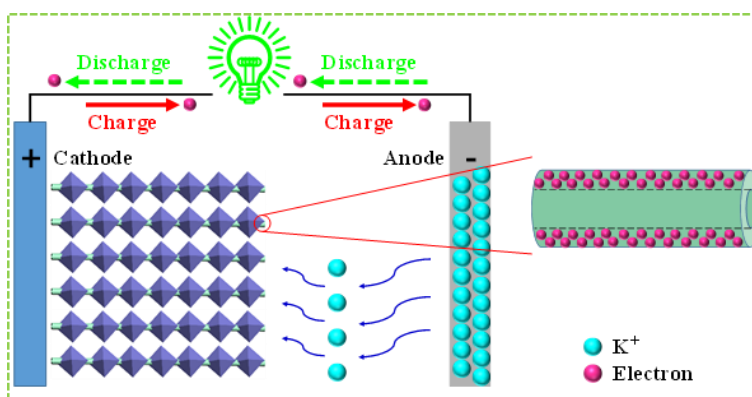

**Figure S23.** Schematic showing the electrochemical behavior in NCNF@CS host.



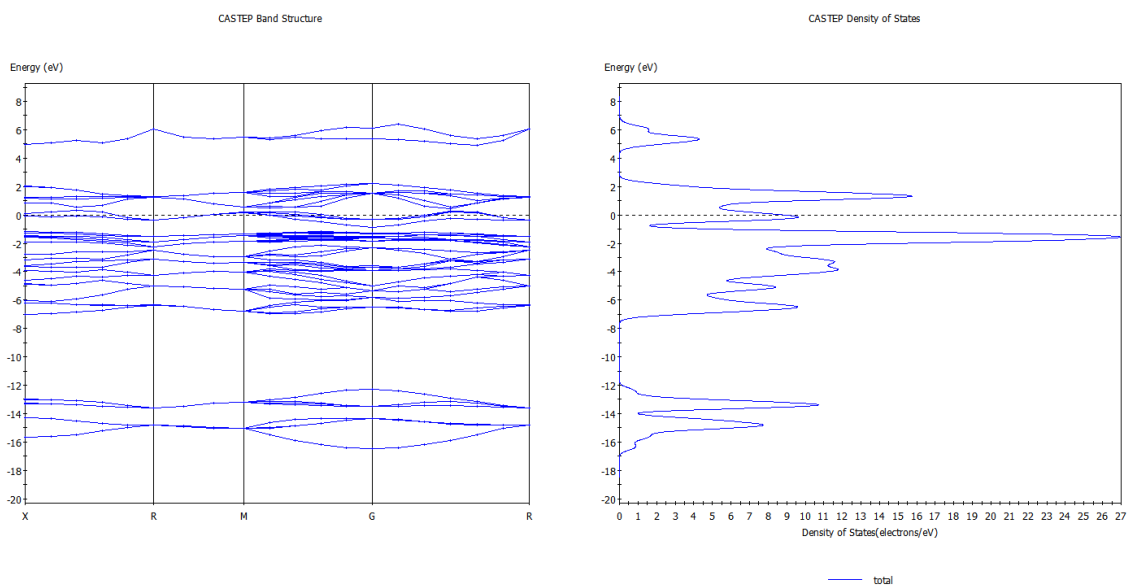

**Figure S24.** The bang gap structure and density of states of  $\text{CoSe}_2$ .

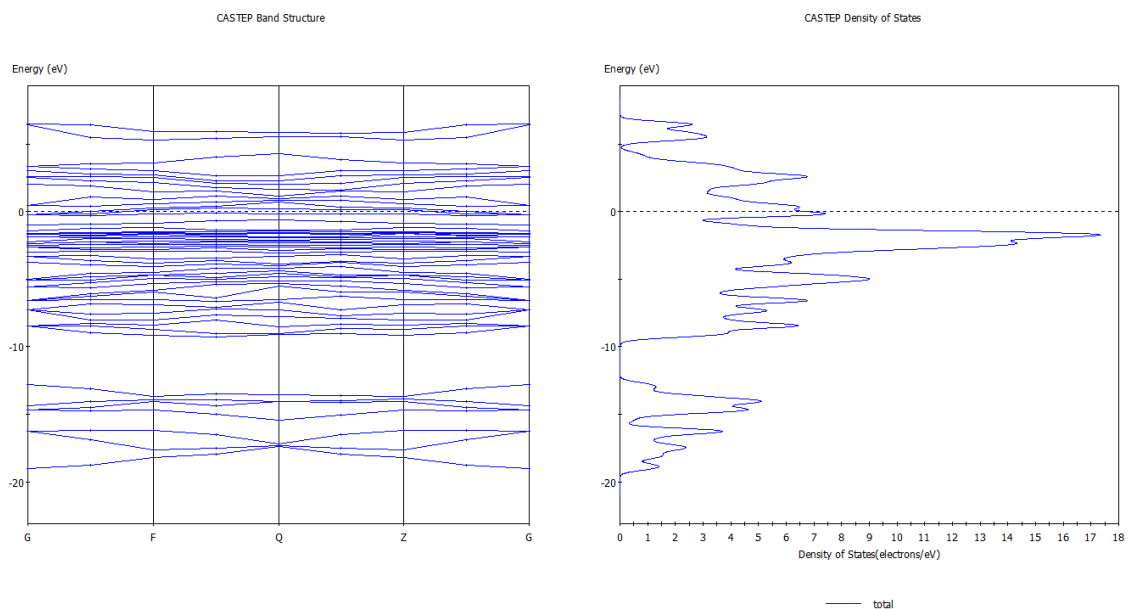

**Figure S25.** The bang gap structure and density of states of  $\text{Co}_3\text{Se}_4$ .

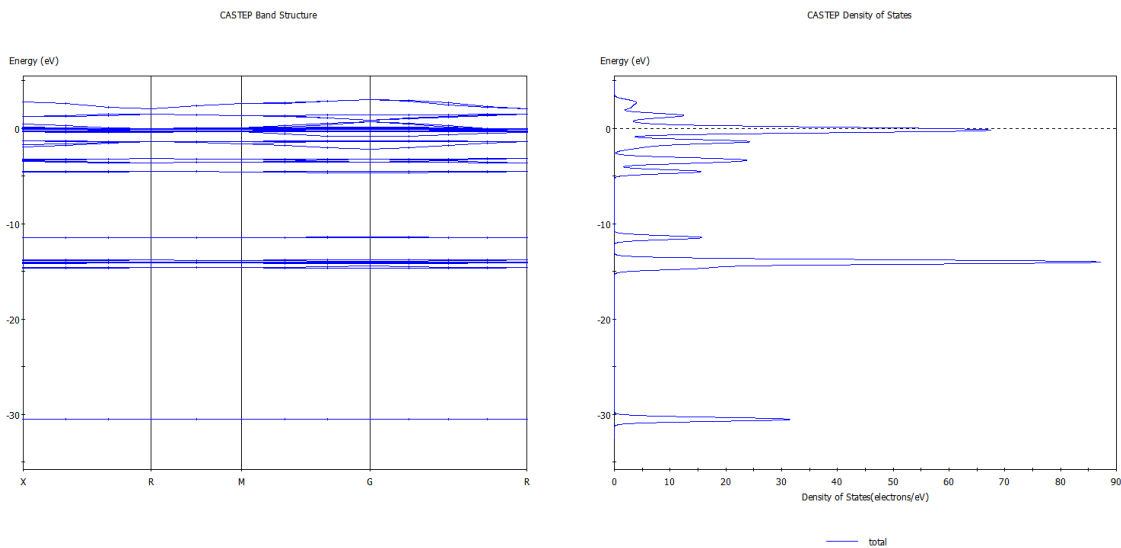

**Figure S26.** The bang gap structure and density of states of  $K_2CoSe_2$ .

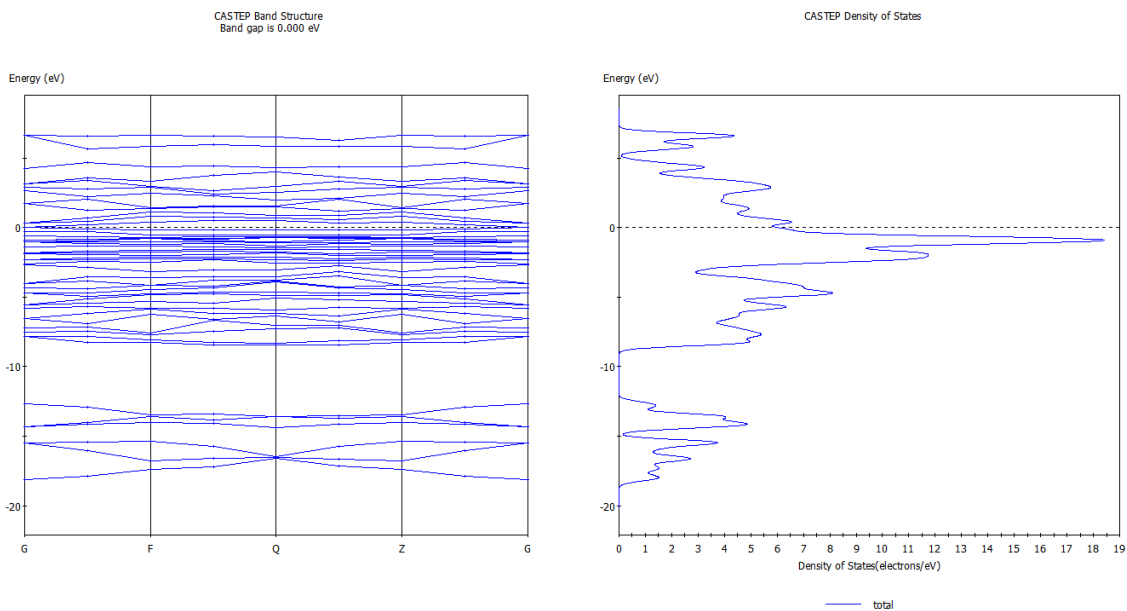

**Figure S27.** The bang gap structure and density of states of  $CoSe$ .

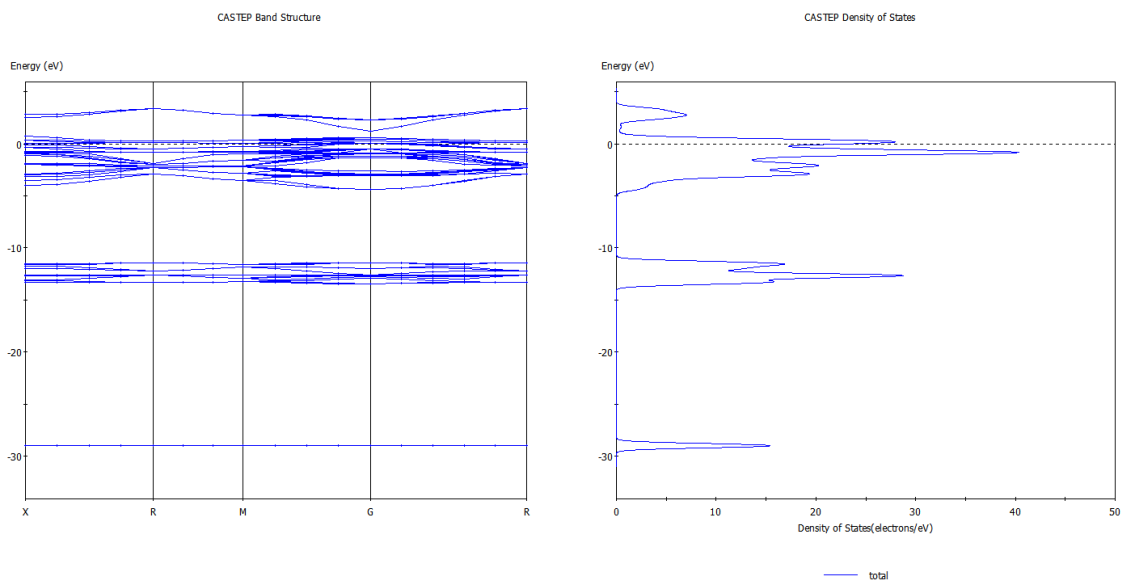

**Figure S28.** The bang gap structure and density of states of  $\text{KCo}_2\text{Se}_2$ .

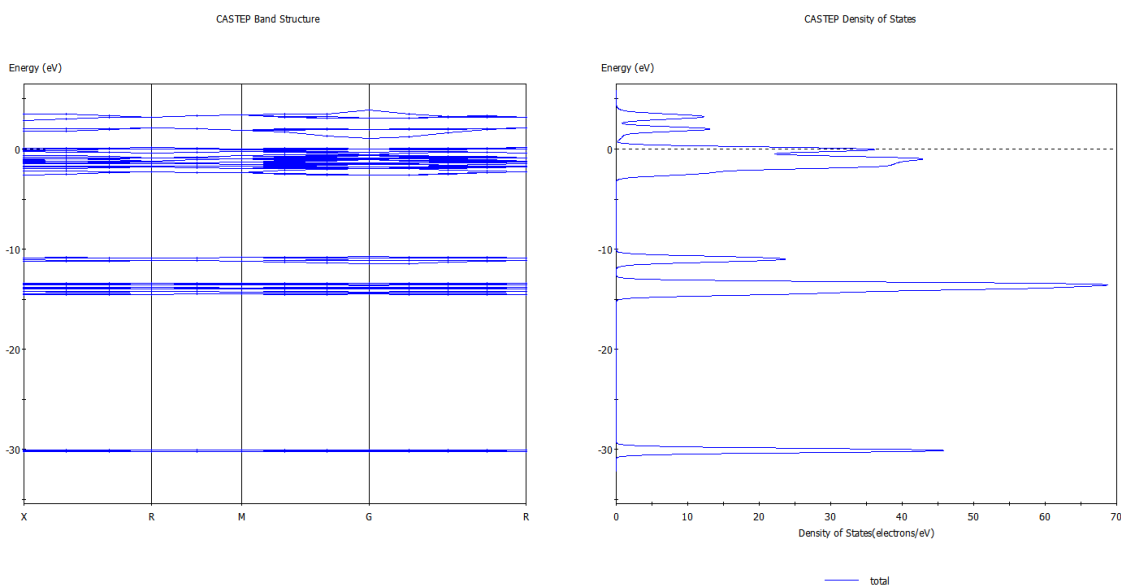

**Figure S29.** The bang gap structure and density of states of  $\text{K}_6\text{CoSe}_4$ .

**Table S1.** The weight percentage of N, C and H of NCNF@CS by elemental analyzer.

| Sample      | Weight Percentage (%) |       |      |
|-------------|-----------------------|-------|------|
|             | N                     | C     | H    |
| NCNF@CS-3h  | 2.42                  | 36.76 | 0.02 |
| NCNF@CS-6h  | 2.28                  | 27.32 | 0.05 |
| NCNF@CS-12h | 1.13                  | 18.24 | 0    |

**Table S2.** Electrochemical performance comparison of the recent reported anode materials for KIBs.

| Sample                                            | Current density: $A\ g^{-1}$ | Capacity: $mAh\ g^{-1}$ | Cycle number | Reference |
|---------------------------------------------------|------------------------------|-------------------------|--------------|-----------|
| NCNF@CS-6h                                        | 0.2                          | 253                     | 100          | This work |
|                                                   | 2                            | 173                     | 600          |           |
| Graphite                                          | 0.14                         | 100                     | 50           | [1]       |
| Hard Carbon                                       | 0.028                        | 216                     | 100          | [2]       |
| N-doped Graphene                                  | 0.1                          | 210                     | 100          | [3]       |
| RGO Film                                          | 0.01                         | 150                     | 175          | [4]       |
| Graphite and Graphene                             | 10                           | 100                     | 1000         | [5]       |
| Graphene                                          | 0.1                          | 140                     | 100          | [6]       |
| $K_2Ti_8O_{17}$                                   | 0.02                         | 111                     | 50           | [7]       |
| Sn/C                                              | 0.025                        | 105                     | 30           | [8]       |
| Dipotassium Terephthalate                         | 0.2                          | 229                     | 100          | [9]       |
| 3,4,9,10-perylene-tetracarboxylicacid-dianhydride | 0.01                         | 160                     | 35           | [10]      |
| $Sn_4P_3/C$                                       | 0.05                         | 307                     | 50           | [11]      |
| Sb/C                                              | 0.035                        | 250                     | 50           | [12]      |
| Black P                                           | 0.05                         | 270                     | 50           | [13]      |
| $SnS_2/rGO$                                       | 0.025                        | 250                     | 30           | [14]      |
| $Sb_2S_3/S,N$ -codoped rGO                        | 0.05                         | 477                     | 100          | [15]      |

**Table S3.** The impedance parameters of the NCNF@CS-6h-based coin cell.

| $R_s\ (\Omega)$ | $R_{ct}\ (\Omega)$ | $\sigma(\Omega\ s^{-0.5})$ | $D\ (cm^2\ s^{-1})$ |
|-----------------|--------------------|----------------------------|---------------------|
|-----------------|--------------------|----------------------------|---------------------|

**Table S4.** The structure information and total energy of different compositions.

| Sample                                                            | supercell                                       | Space Group | a      | b      | c      | $\alpha$ | $\beta$ | $\gamma$ | Volume | total energy(eV) |
|-------------------------------------------------------------------|-------------------------------------------------|-------------|--------|--------|--------|----------|---------|----------|--------|------------------|
| CoSe <sub>2</sub>                                                 | Co <sub>4</sub> Se <sub>8</sub>                 | Pa-3        | 5.733  | 5.733  | 5.733  | 90       | 90      | 90       | 188.44 | -66.27           |
| Co <sub>3</sub> Se <sub>4</sub>                                   | Co <sub>4</sub> Se <sub>8</sub>                 | C2/m        | 11.548 | 3.515  | 6.054  | 90       | 119.27  | 90       | 214.35 | -81.99           |
| K <sub>2</sub> CoSe <sub>2</sub>                                  | K <sub>8</sub> Co <sub>4</sub> Se <sub>8</sub>  | Ibam        | 6.862  | 12.924 | 6.029  | 90       | 90      | 90       | 534.60 | -83.84           |
| CoSe                                                              | Co <sub>2</sub> Se <sub>2</sub>                 | P63/mmc     | 3.552  | 3.552  | 5.100  | 90       | 90      | 120      | 55.73  | -24.06           |
| KCo <sub>2</sub> Se <sub>2</sub>                                  | K <sub>2</sub> Co <sub>4</sub> Se <sub>4</sub>  | I4/mmm      | 3.711  | 3.711  | 13.513 | 90       | 90      | 90       | 186.06 | -53.45           |
| K <sub>6</sub> CoSe <sub>4</sub>                                  | K <sub>12</sub> Co <sub>2</sub> Se <sub>8</sub> | P63mc       | 10.008 | 10.008 | 7.805  | 90       | 90      | 120      | 677.02 | -62.78           |
| Co                                                                | Co <sub>2</sub>                                 | P63/mmc     | 2.416  | 2.416  | 3.919  | 90       | 90      | 120      | 19.82  | -14.99           |
| K                                                                 | K <sub>2</sub>                                  | Im-3m       | 5.216  | 5.216  | 5.216  | 90       | 90      | 90       | 141.92 | -2.24            |
| K <sub>2</sub> Se                                                 | K <sub>8</sub> Se <sub>4</sub>                  | Fm-3m       | 7.617  | 7.617  | 7.617  | 90       | 90      | 90       | 441.99 | -37.52           |
| Co(K <sub>a</sub> )Se <sub>2</sub>                                | Co <sub>4</sub> K <sub>4</sub> Se <sub>8</sub>  | Pa-3        | 7.584  | 7.584  | 7.584  | 90       | 90      | 90       | 436.23 | -62.52           |
| Co(K <sub>b</sub> ) <sub>2</sub> Se <sub>2</sub>                  | Co <sub>4</sub> K <sub>8</sub> Se <sub>8</sub>  | Pa-3        | 8.244  | 8.244  | 8.244  | 90       | 90      | 90       | 560.25 | -61.53           |
| Co(K <sub>a</sub> )(K <sub>b</sub> ) <sub>2</sub> Se <sub>2</sub> | Co <sub>4</sub> K <sub>12</sub> Se <sub>8</sub> | Pa-3        | 9.528  | 9.528  | 9.528  | 90       | 90      | 90       | 865.11 | -62.78           |
| Co <sub>3</sub> KSe <sub>4</sub>                                  | Co <sub>6</sub> K <sub>2</sub> Se <sub>8</sub>  | C2/m        | 17.468 | 3.365  | 8.636  | 90       | 140.57  | 90       | 322.38 | -86.54           |

**Table S5.** The structure and bind gap of different compositions.

| Sample      | CoSe <sub>2</sub>               | Co <sub>3</sub> Se <sub>4</sub> | K <sub>2</sub> CoSe <sub>2</sub>               | CoSe                            | KCo <sub>2</sub> Se <sub>2</sub>               | K <sub>6</sub> CoSe <sub>4</sub>                | Co              | K <sub>2</sub> Se              |
|-------------|---------------------------------|---------------------------------|------------------------------------------------|---------------------------------|------------------------------------------------|-------------------------------------------------|-----------------|--------------------------------|
| supercell   | Co <sub>4</sub> Se <sub>8</sub> | Co <sub>4</sub> Se <sub>8</sub> | K <sub>8</sub> Co <sub>4</sub> Se <sub>8</sub> | Co <sub>2</sub> Se <sub>2</sub> | K <sub>2</sub> Co <sub>4</sub> Se <sub>4</sub> | K <sub>12</sub> Co <sub>2</sub> Se <sub>8</sub> | Co <sub>2</sub> | K <sub>8</sub> Se <sub>4</sub> |
| Space Group | Pa-3                            | C2/m                            | Ibam                                           | P63/mmc                         | I4/mmm                                         | P63mc                                           | P63/mmc         | Fm-3m                          |
| Band Gap/eV | 0                               | 0                               | 0                                              | 0                               | 0                                              | 0                                               | 0               | 2.108                          |

## References

- [1] Z. Jian, W. Luo, X. Ji, *J. Am. Chem. Soc.* **2015**, *137*, 11566.
- [2] Z. Jian, Z. Xing, C. Bommier, Z. Li, X. Ji, *Adv. Energy Mater.* **2016**, *6*, 1501874.
- [3] K. Share, A. P. Cohn, R. Carter, B. Rogers, C. L. Pint, *ACS Nano* **2016**, *10*, 9738.
- [4] W. Luo, J. Wan, B. Ozdemir, W. Bao, Y. Chen, J. Dai, H. Lin, Y. Xu, F. Gu, V. Barone, L. Hu, *Nano Lett.* **2015**, *15*, 7671.

- [5] A. P. Cohn, N. Muralidharan, R. Carter, K. Share, L. Oakes, C. L. Pint, *J. Mater. Chem. A* **2016**, *4*, 14954.
- [6] K. Share, A. P. Cohn, R. Carter, C. Pint, *Nanoscale* **2016**, *8*, 16435.
- [7] J. Han, M. Xu, Y. Niu, G. Li, M. Wang, Y. Zhang, M. Jia, C. Li, *Chem. Commun.* **2016**, *52*, 11274.
- [8] I. Sultana, T. Ramireddy, M. M. Rahman, Y. Chen, A. M. Glushenkov, *Chem. Commun.* **2016**, *52*, 9279.
- [9] K. Lei, F. Li, C. Mu, J. Wang, Q. Zhao, C. Chen, Jun Chen, *Energy Environ. Sci.* **2017**, *10*, 552.
- [10] Y. Chen, W. Luo, M. Carter, L. Zhou, J. Dai, K. Fu, S. Lacey, T. Li, J. Wan, X. Han, Y. Bao, L. Hu. *Nano Energy* **2015**, *18*, 205.
- [11] W. Zhang, J. Mao, S. Li, Z. Chen, Z. Guo. *J. Am. Chem. Soc.* **2017**, *139*, 3316.
- [12] W. D. McCulloch, X. Ren, M. Yu, Z. Huang, Y. Wu, *ACS Appl. Mater. Interfaces* **2015**, *7*, 26158.
- [13] I. Sultana, M. M. Rahman, T. Ramireddy, Y. Chen, A. M. Glushenkov, *J. Mater. Chem. A* **2017**, *5*, 23506.
- [14] V. Lakshmi, Y. Chen, A. A. Mikhaylov, A. G. Medvedev, I. Sultana, M. M. Rahman, O. Lev, P. V. Prikhodchenko, A. M. Glushenkov, *Chem. Commun.* **2017**, *53*, 8272.
- [15] Y. Lu, J. Chen, *Sci. China Chem.* **2017**, *60*, 1533.
